# Supplementary material
Source: publisher site journal article supplement (https://www.spandidos-publications.com/4934/downloadSupplementary)

Figure S1. Flow cytometry was used to analyze the representative views of IFN- $\gamma$ , TNF- $\alpha$ , IL-2, IL-4, IL-6, IL-10 and IL-17A in the HT, GD and NC groups. The figure on the left is a quantitative measure of cytokine representativeness and on the right is a histogram of representational peaks. The y-axis is pg/ml. HT, Hashimoto's thyroiditis; GD, Graves' disease; NC, negative control.

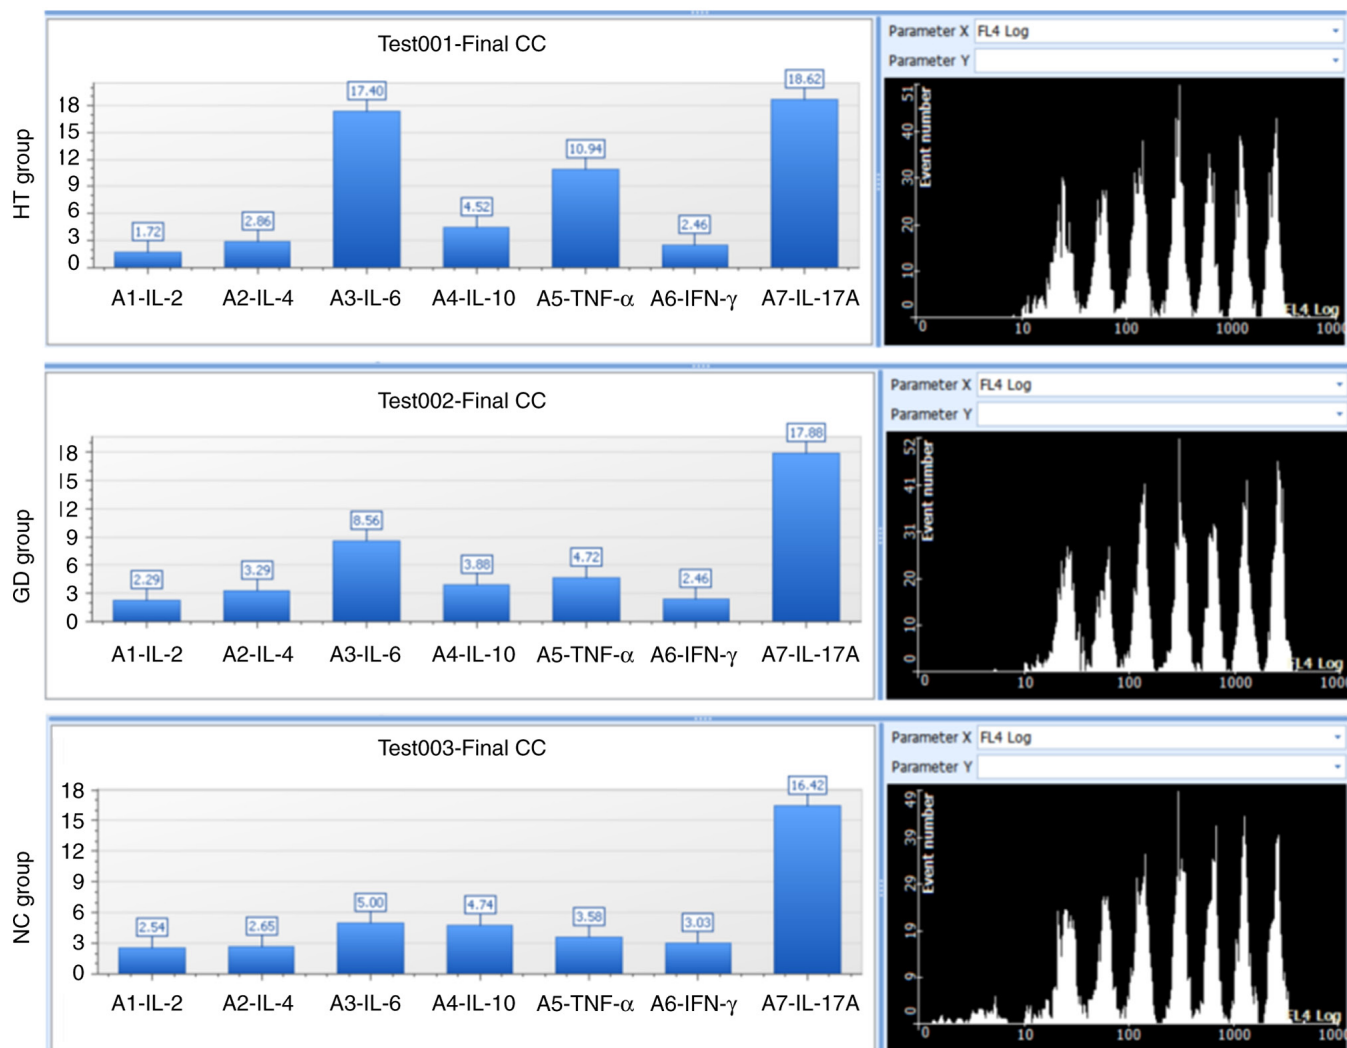

Supplement: Supplementary file 1 [file downloadSupplementary]
